# Supplementary material for: How Deep-Sea Wood Falls Sustain Chemosynthetic Life
Source: PLOS journal article supplement (doi:10.1371/journal.pone.0053590), 2013-01-02
Supplement: S3 (10.1371/journal.pone.0053590.s003) [file journal.pone.0053590.s003]

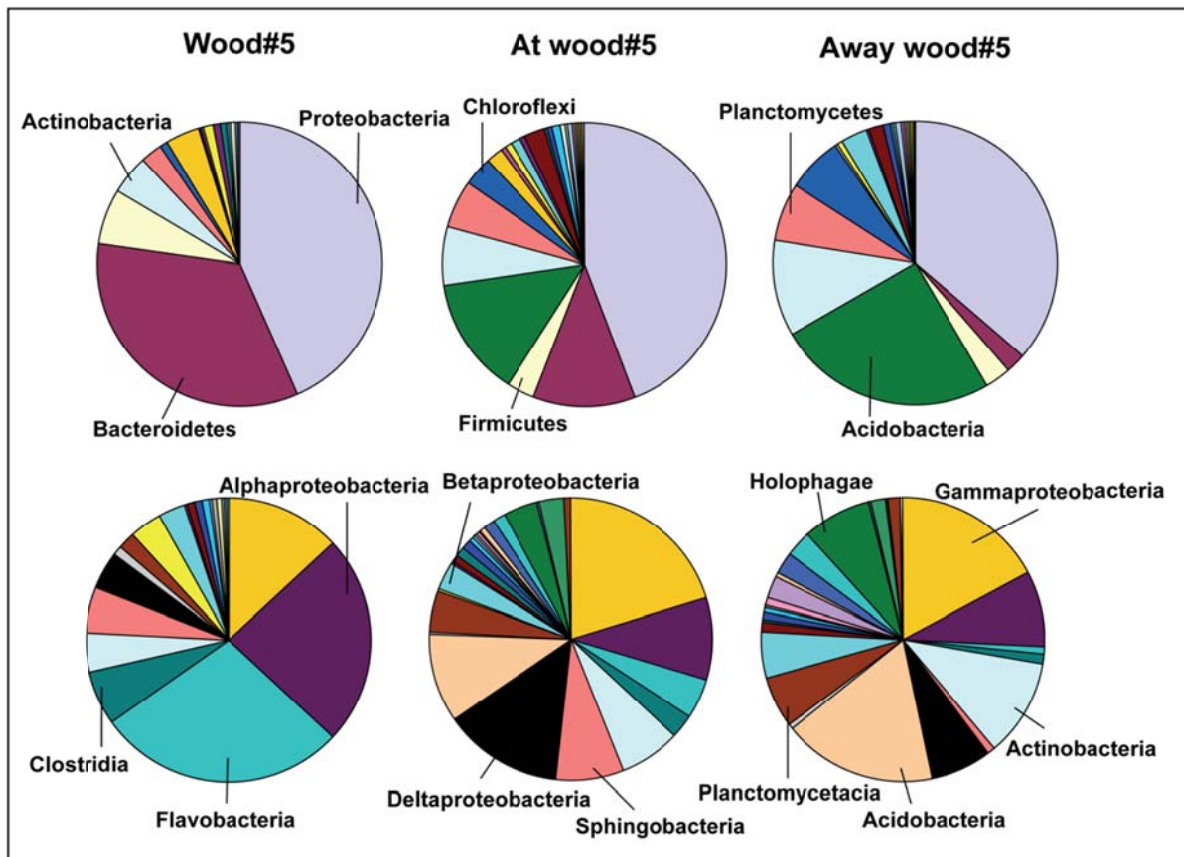

**Figure S3** Bacterial community composition of the wood, wood-chip sediment boundary layer (at wood), and background sediment samples (away wood) of wood experiment#5 at the phylum and class level based on 454 massively parallel tag sequencing.
