# Supplementary material for: How Deep-Sea Wood Falls Sustain Chemosynthetic Life
Source: PLOS journal article supplement (doi:10.1371/journal.pone.0053590), 2013-01-02
Supplement: S4 (10.1371/journal.pone.0053590.s004) [file journal.pone.0053590.s004]

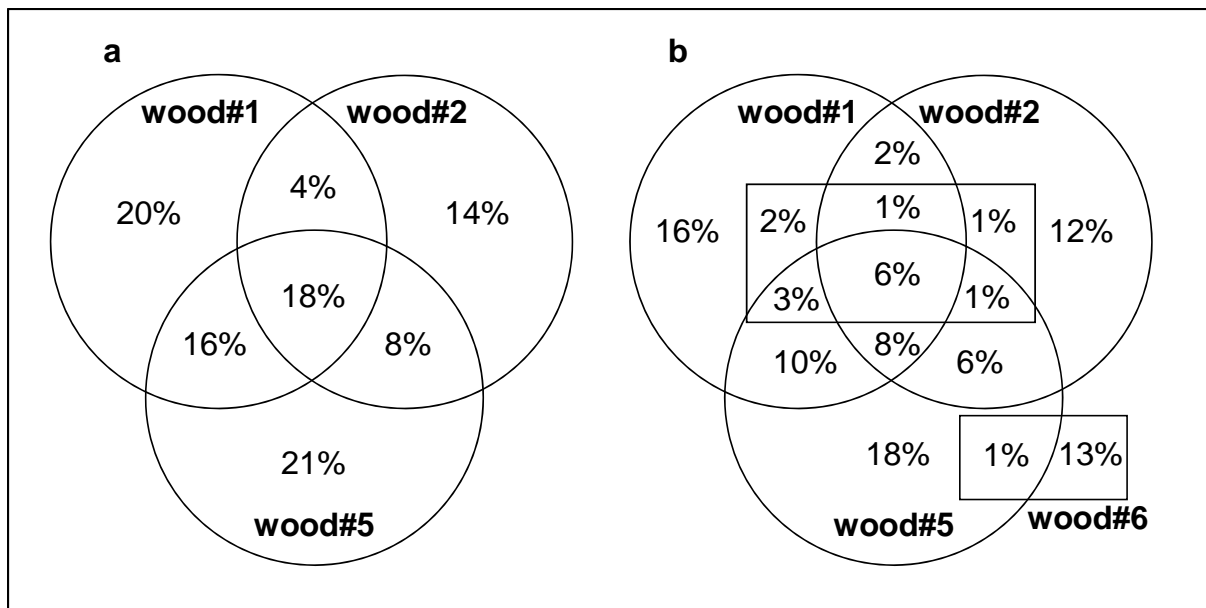

**Figure S4** Shared proportions of OTU<sub>0.03</sub> between wood experiments wood#1, wood#2, wood#5 (submerged for 1 year) and control wood#6 (submerged <1 day).
